# Supplementary material for: Comprehensive DNA methylation study identifies novel progression-related and prognostic markers for cutaneous melanoma
Source: PubMed Central journal article supplement (PMC5458482; doi:10.1186/s12916-017-0851-3), 2017-06-05

# Supplementary Figure 1

a

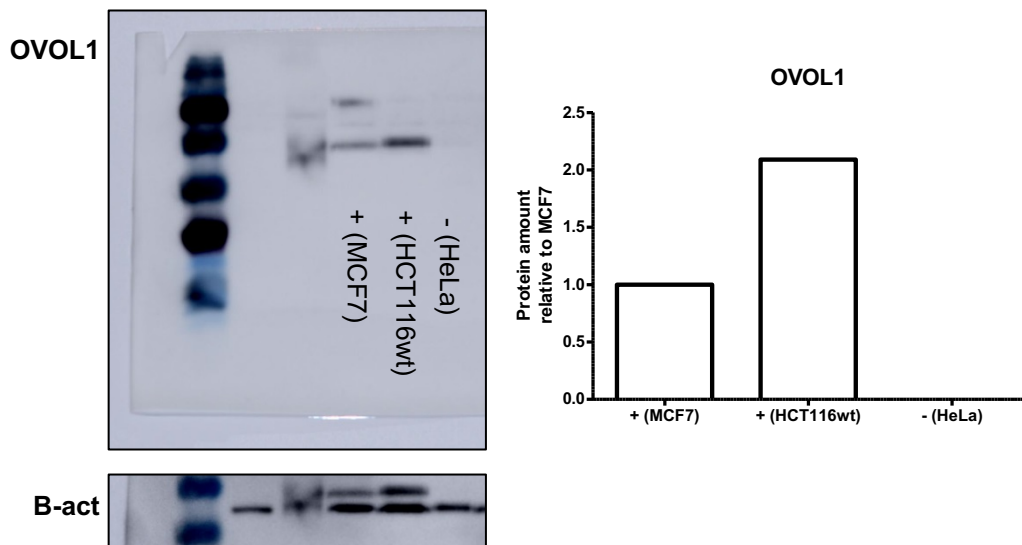

b

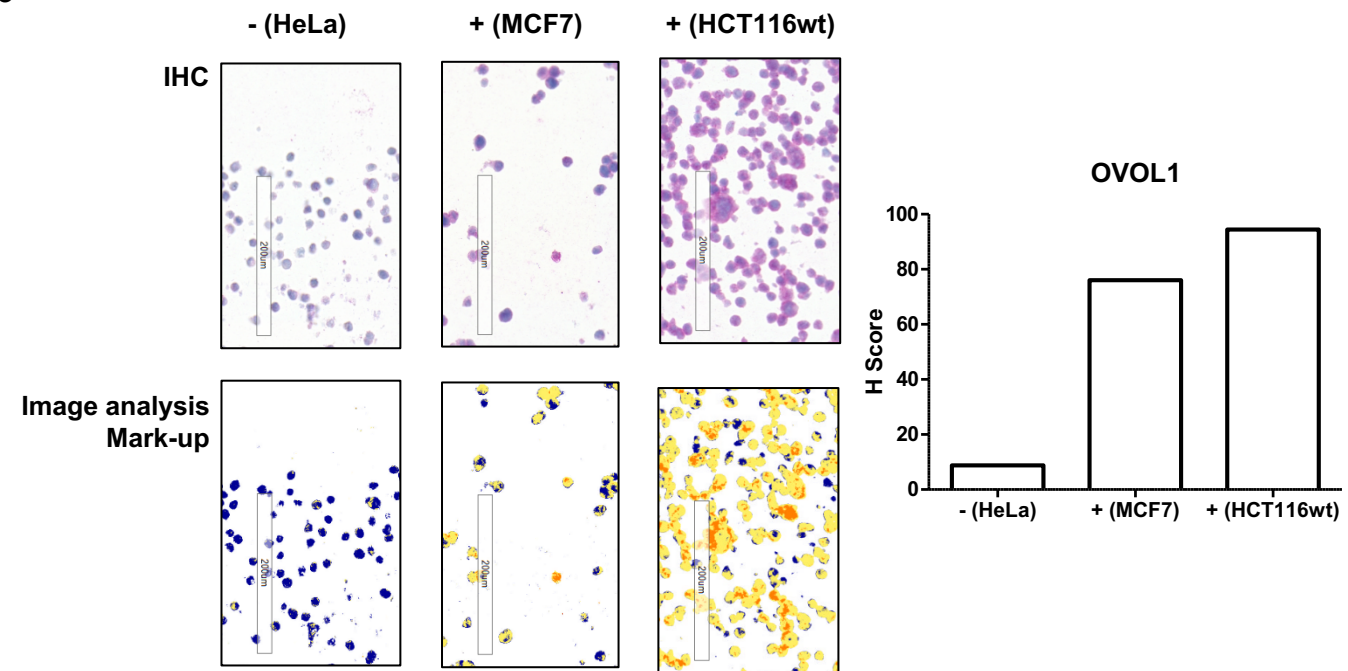

c

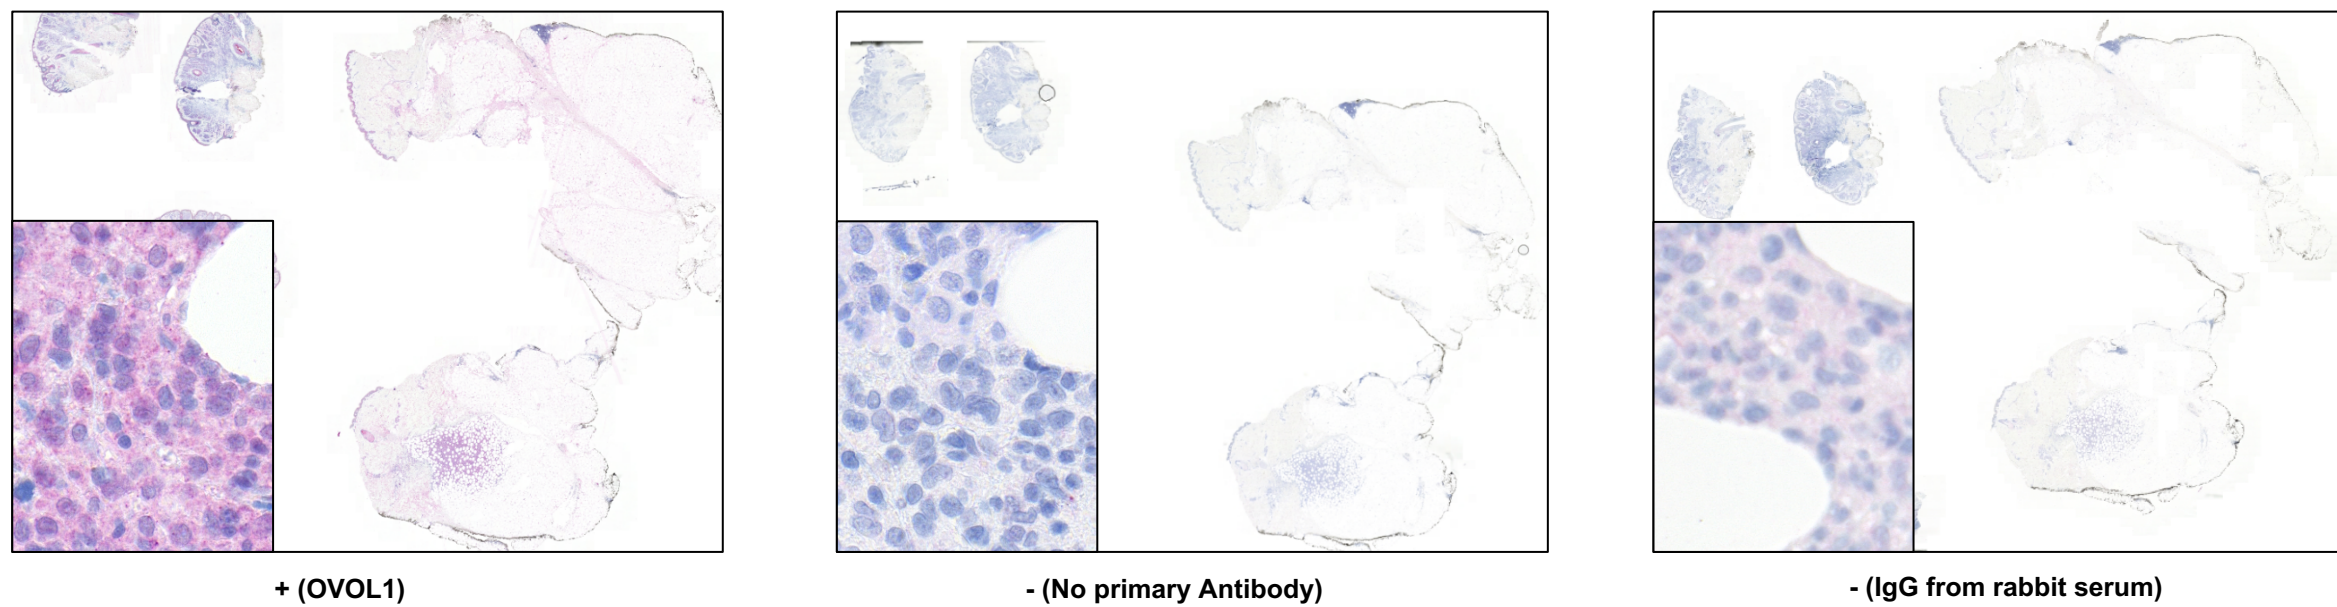

# Supplementary Figure 2

a

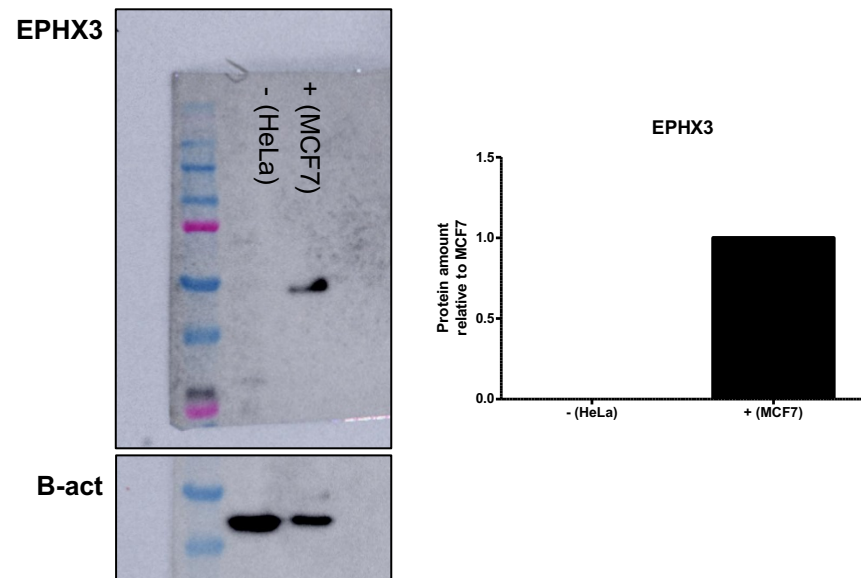

b

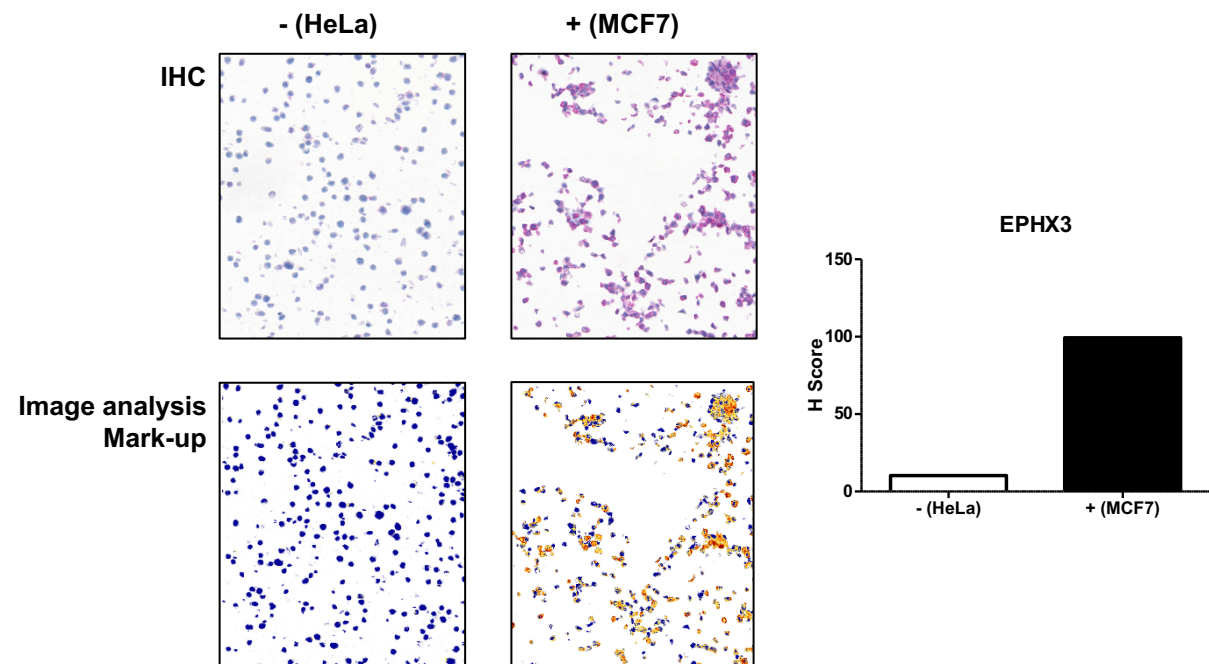

c

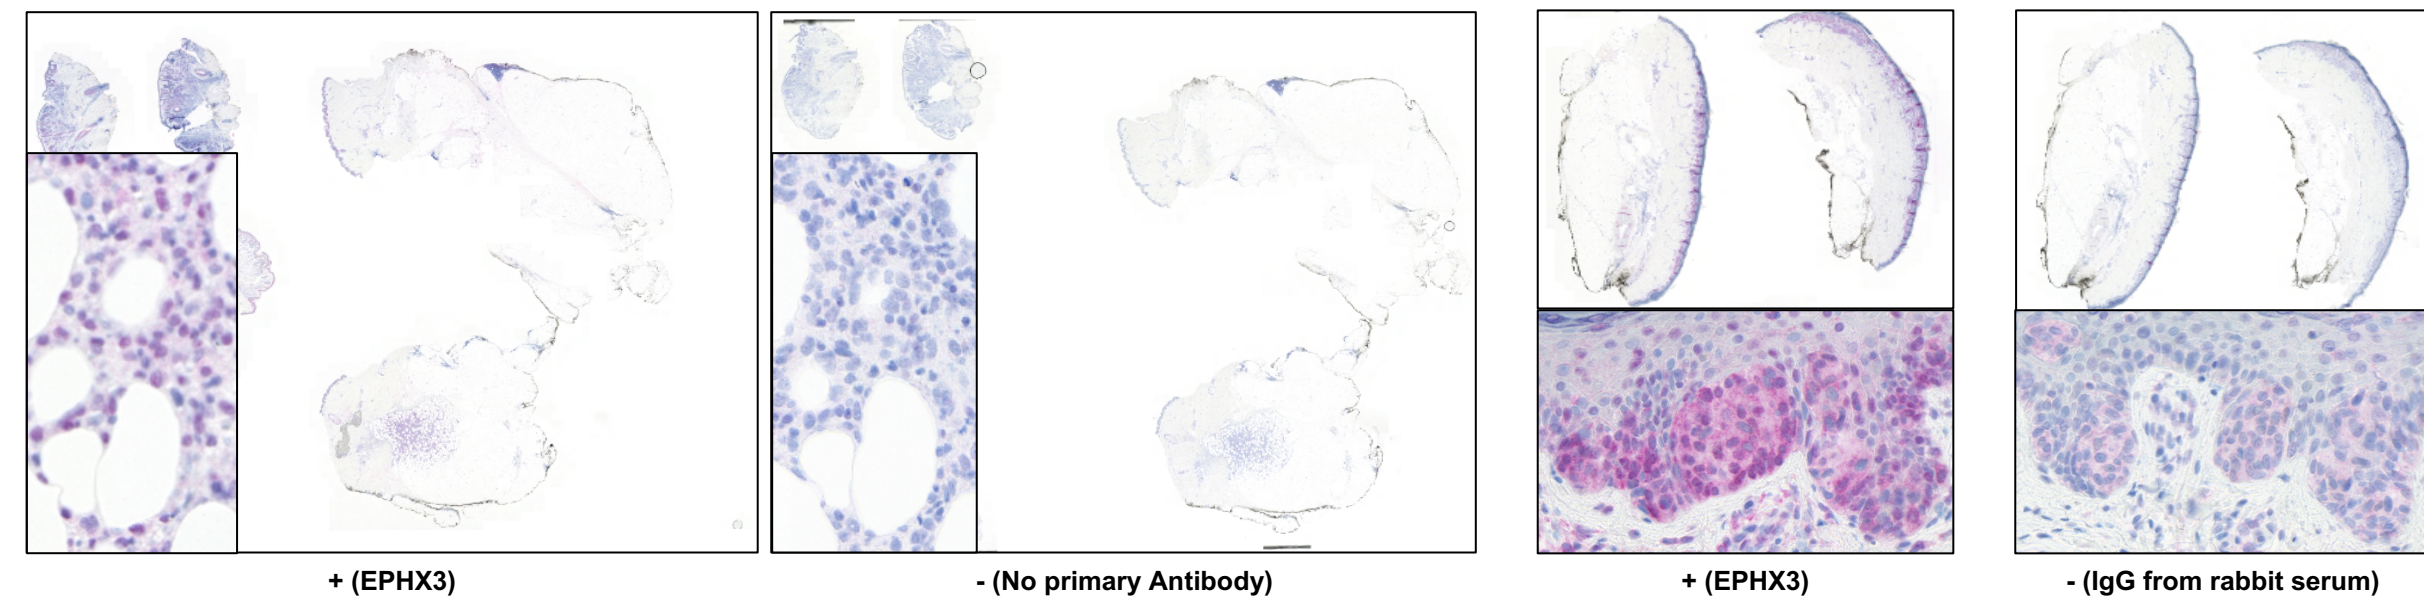

# Supplementary Figure 3

a

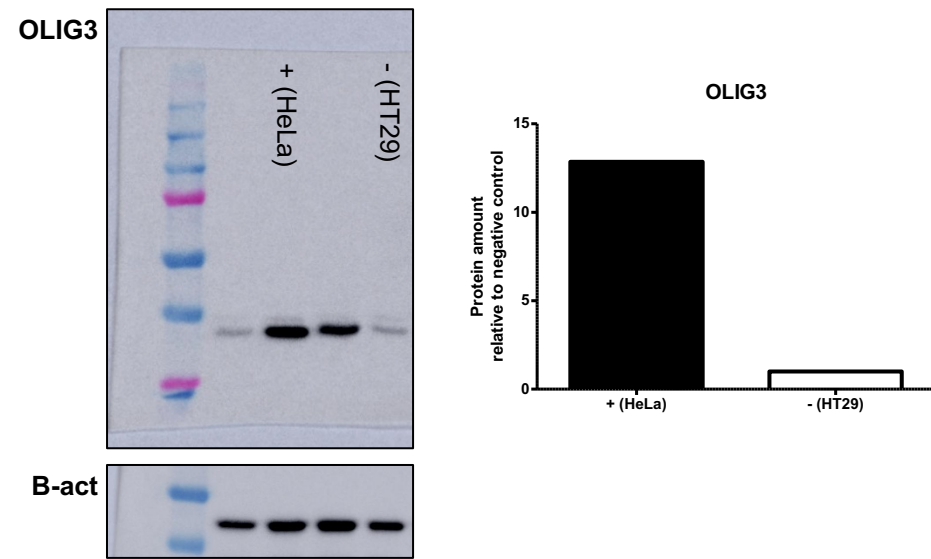

b

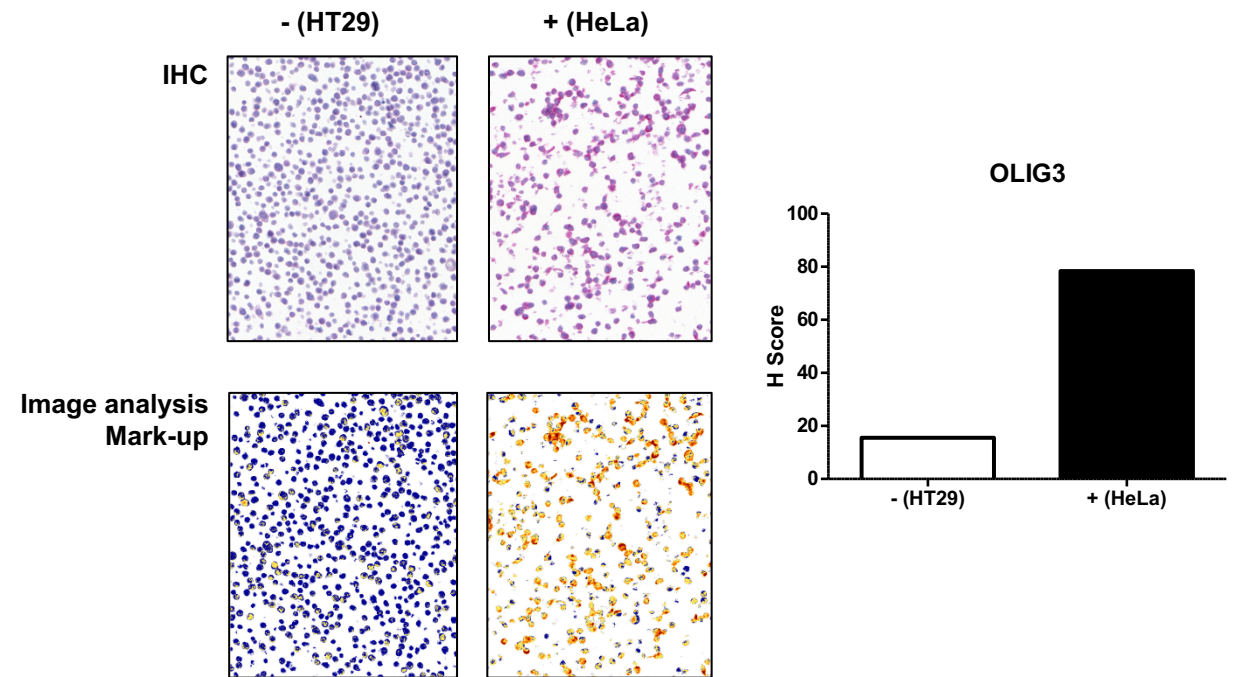

c

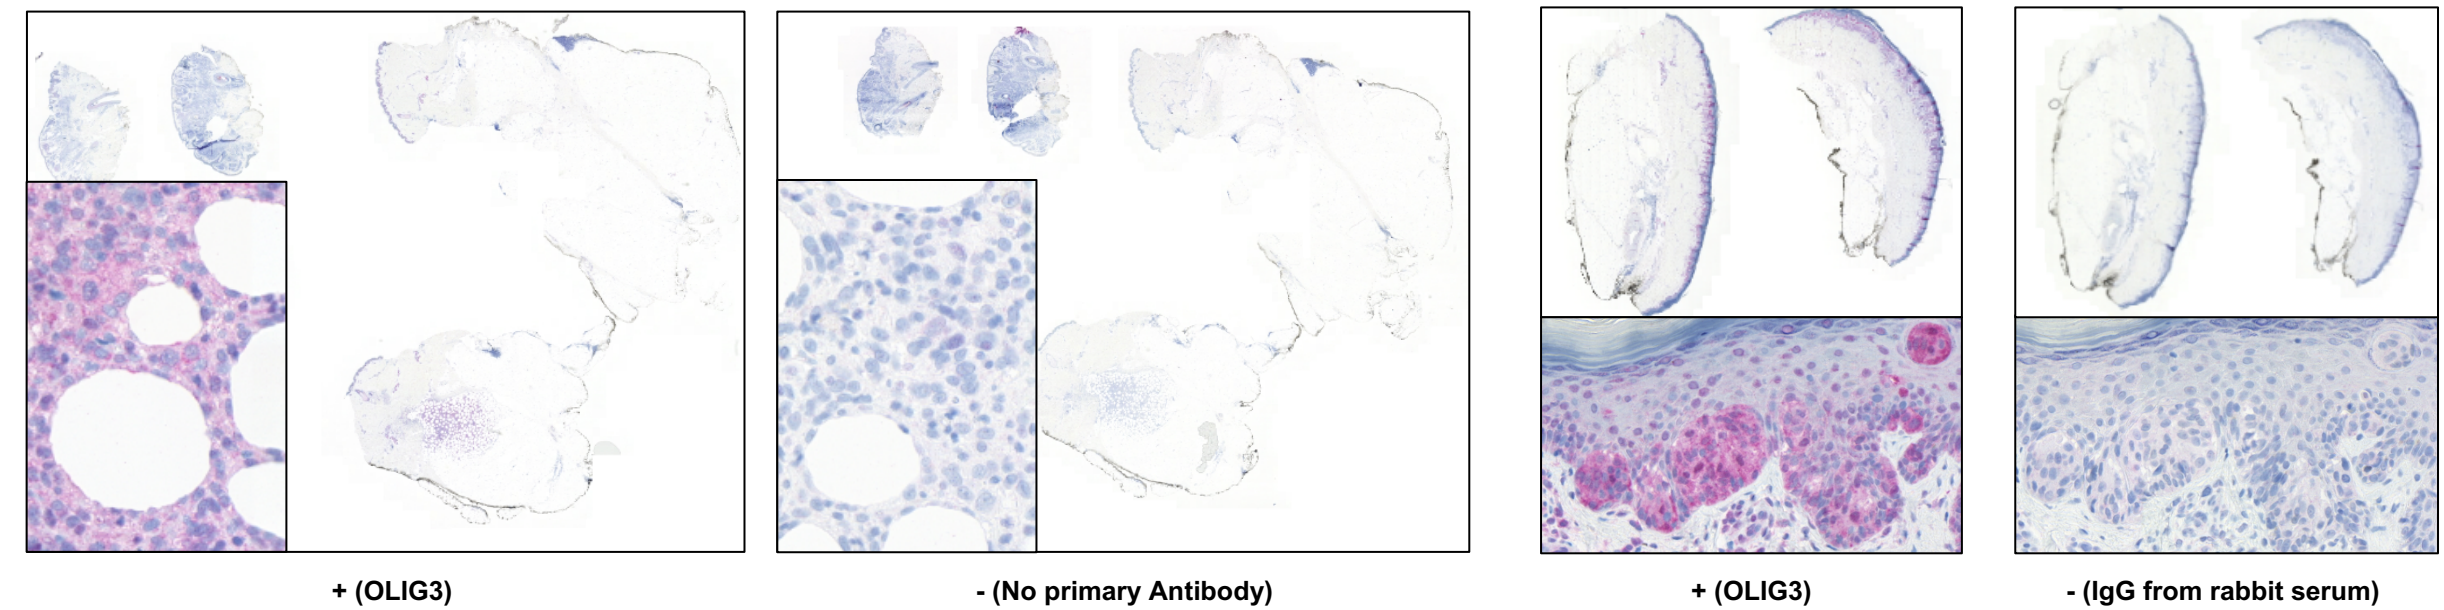

# Supplementary Figure 4

**a**

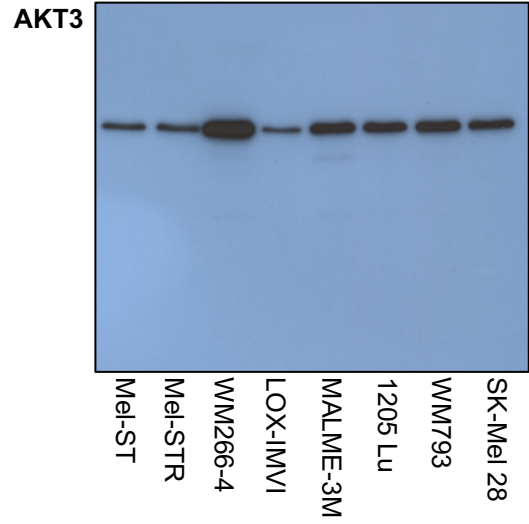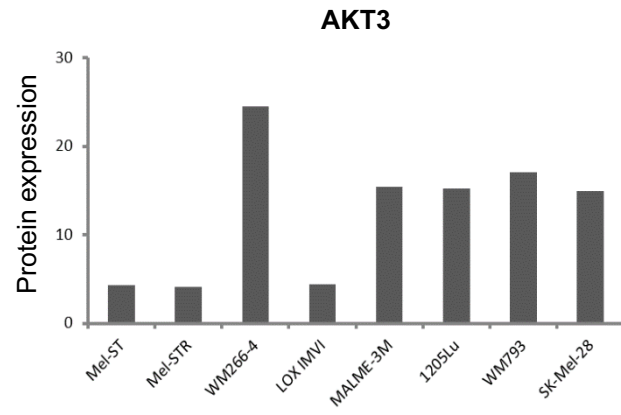

**b**

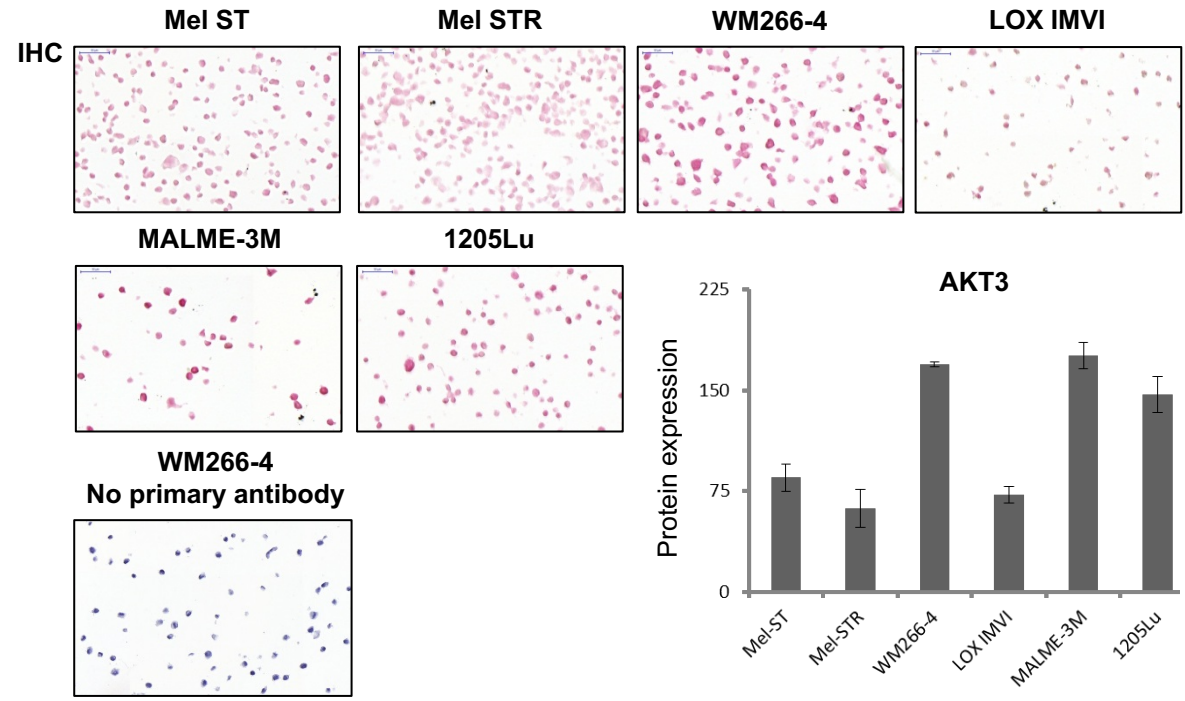

**c**

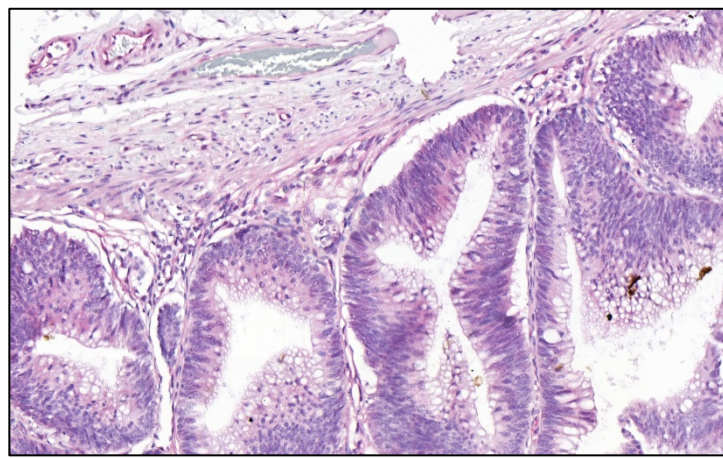

**+ (AKT3)**

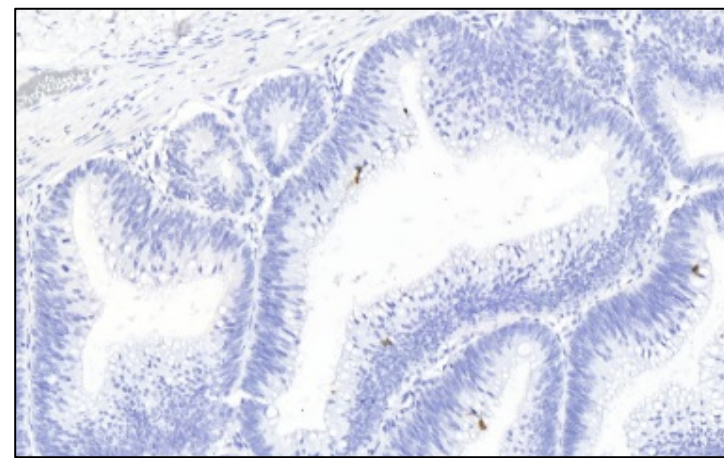

**- (No primary Antibody)**

# Supplementary Figure 5

**a**

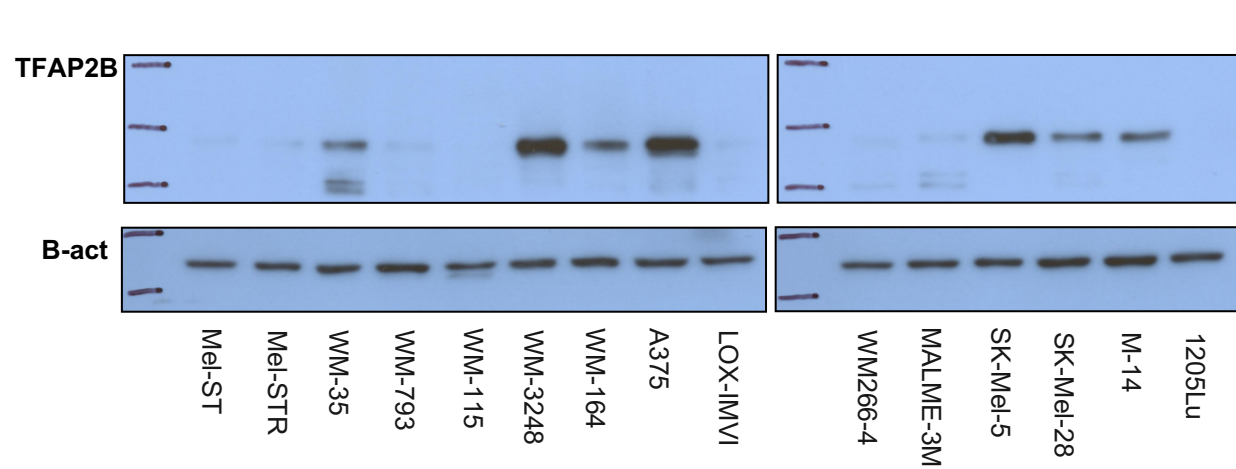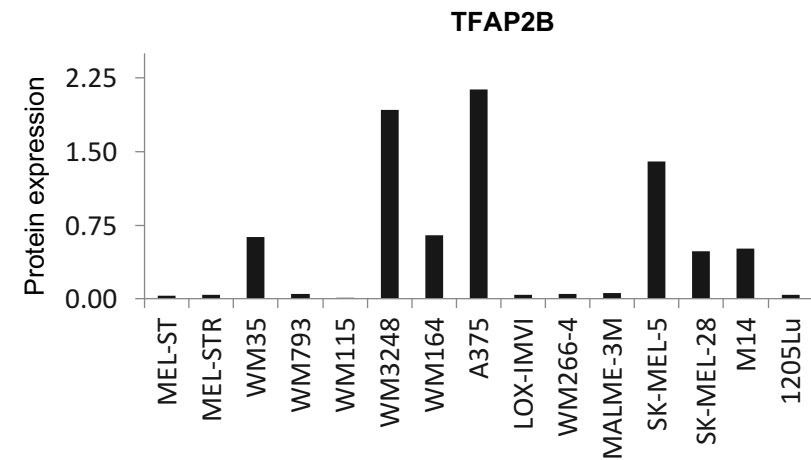

**b**

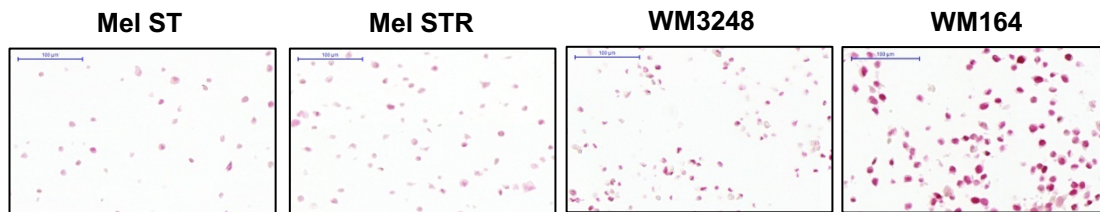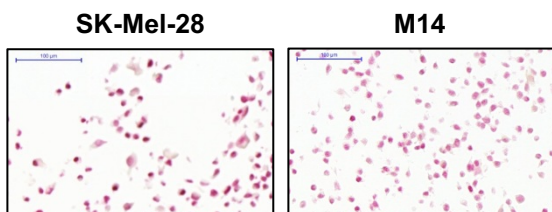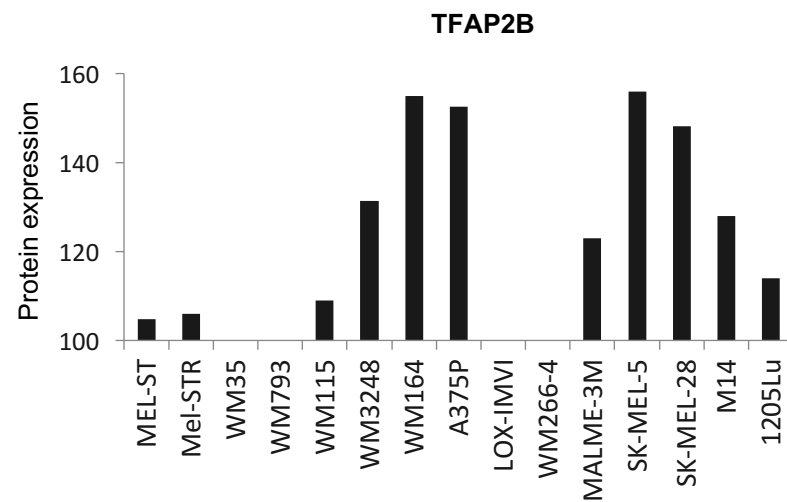

**c**

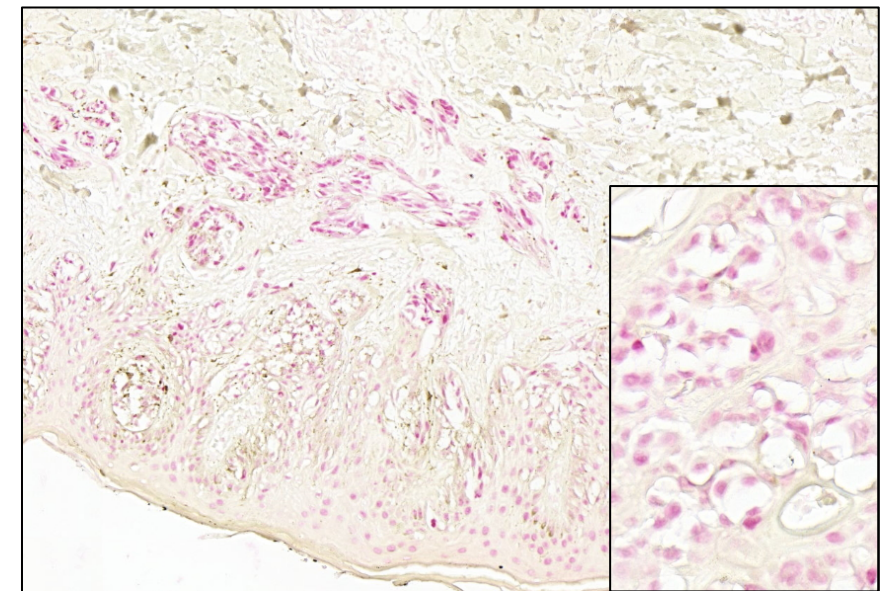

**TFAP2B**

**Nevus**

**Primary melanoma**

**Metastasis**

**OVOL1**

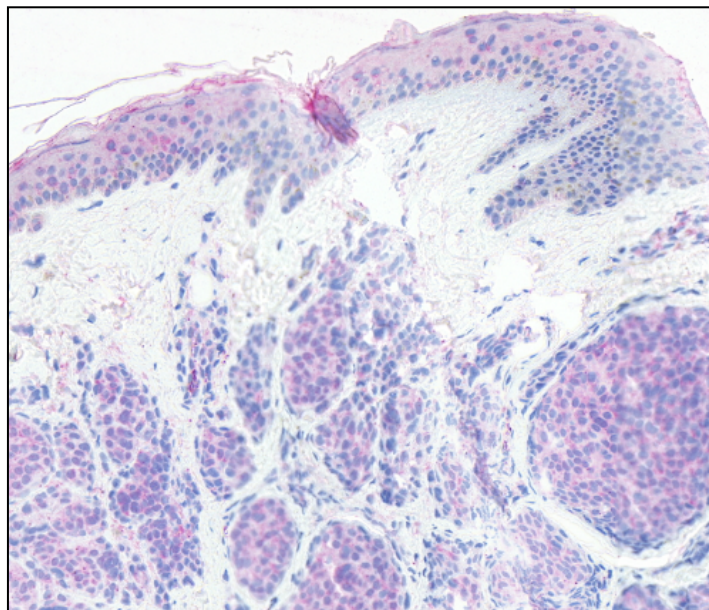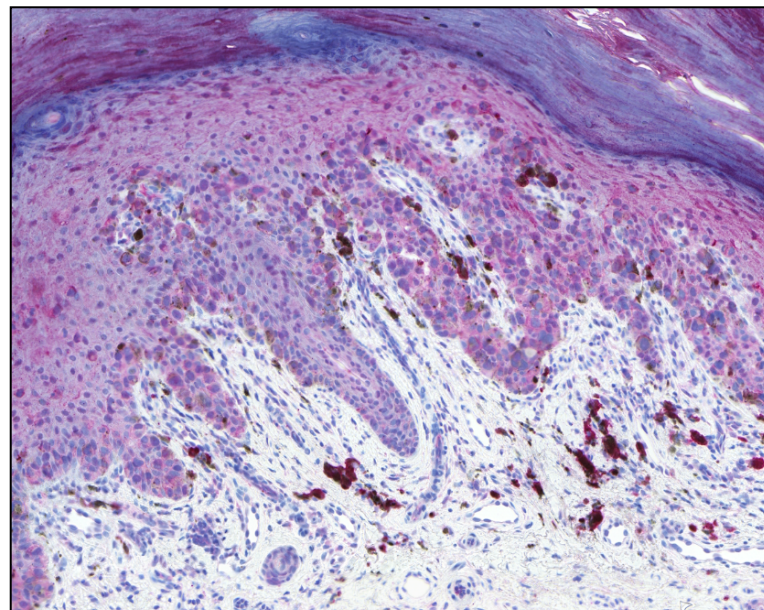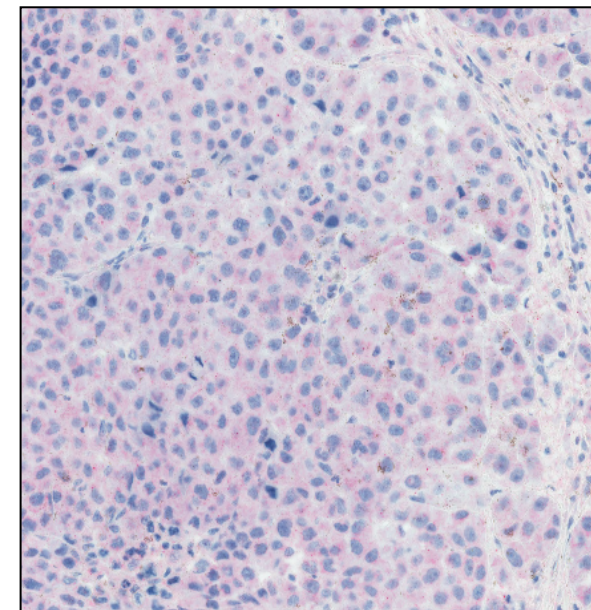

**EPHX3**

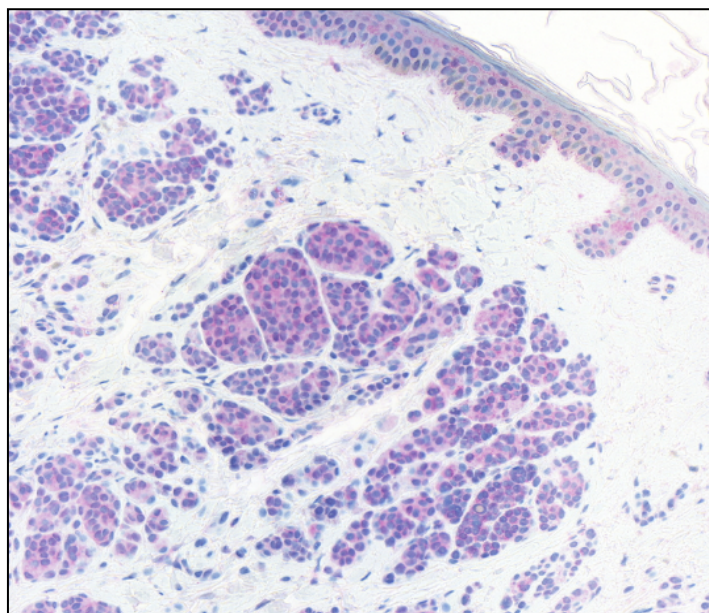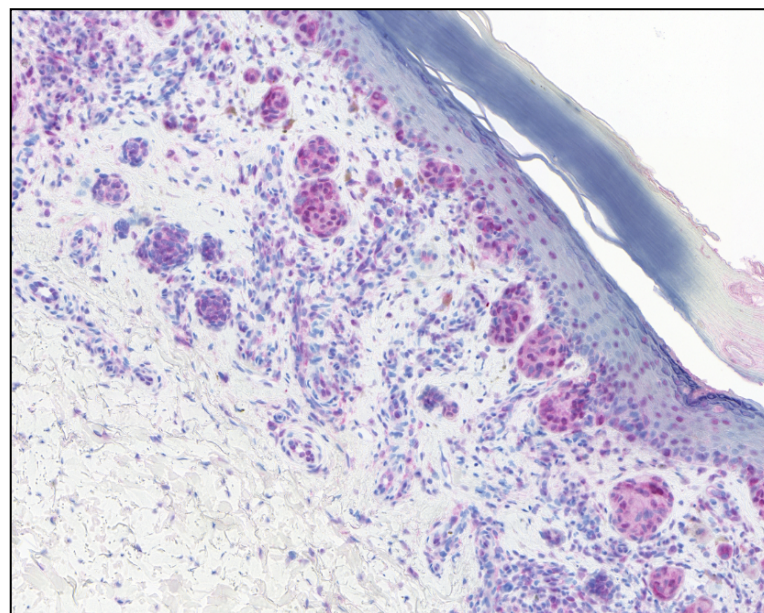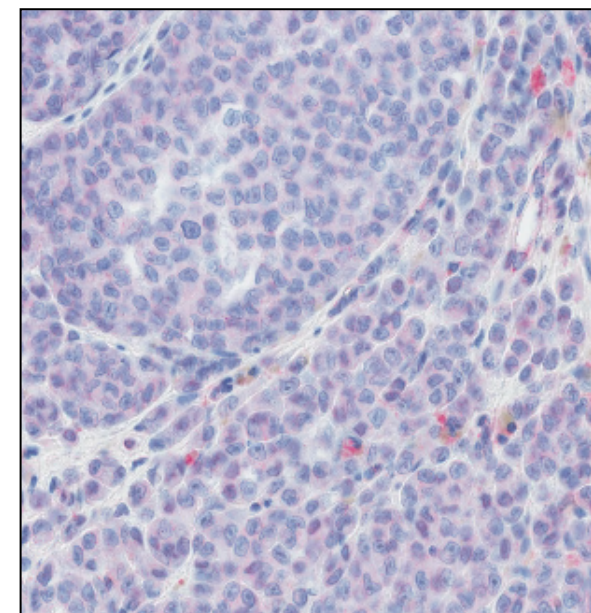

Supplementary Figure 7

**OLIG3 - Nevus**

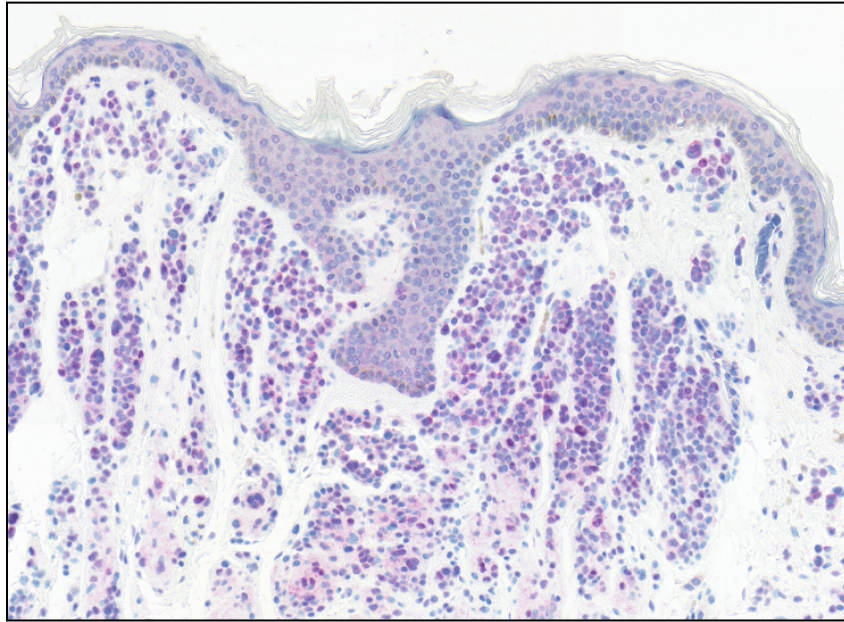

**OLIG3 – Primary melanoma**

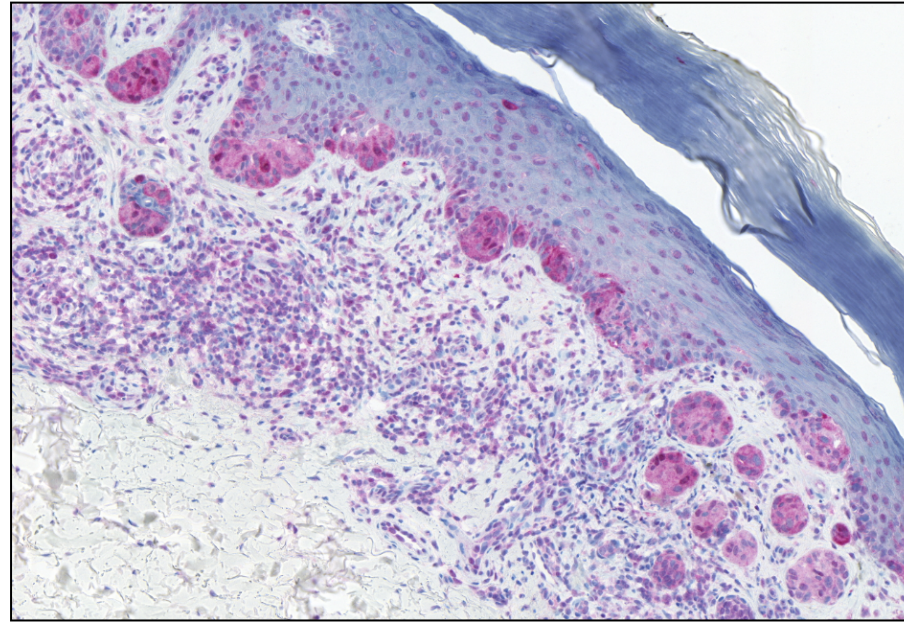

**OLIG3 – Metastasis**

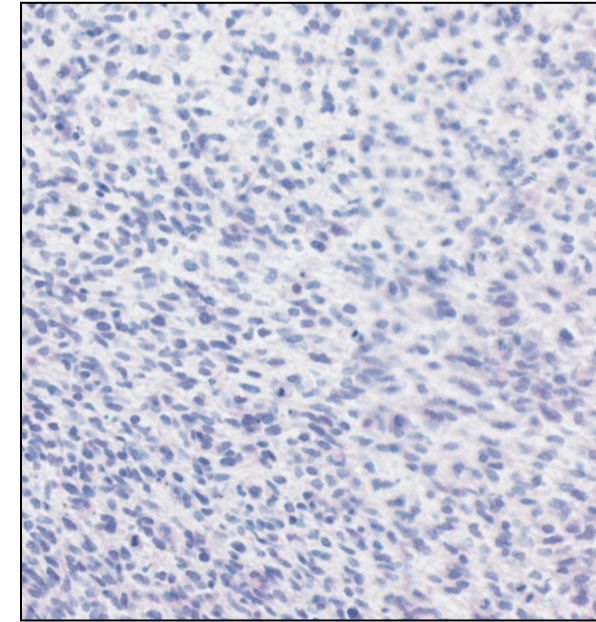

**AKT3 – Primary melanoma**

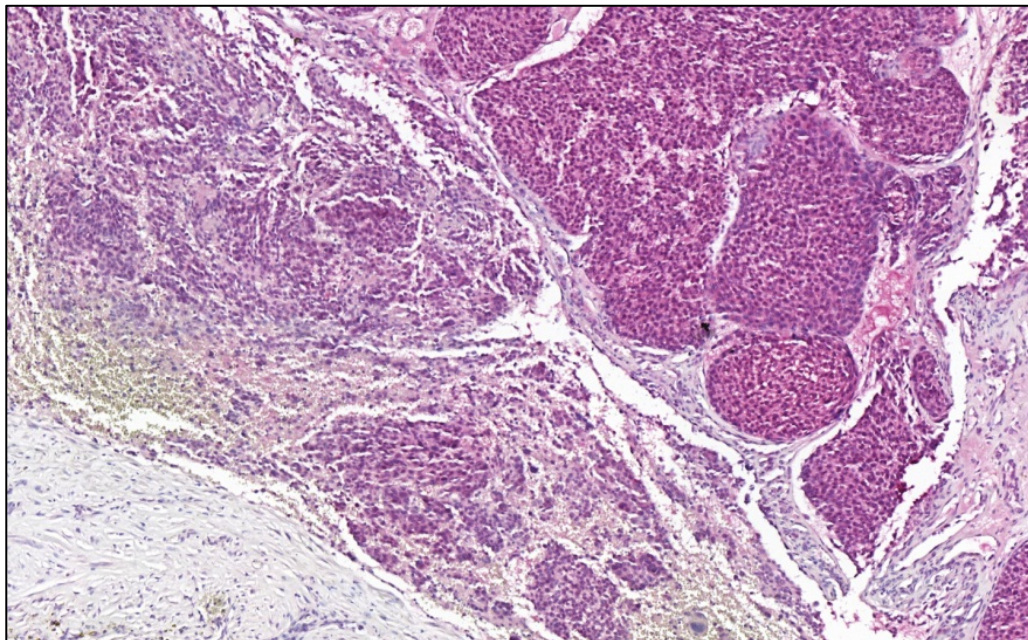

**TFAP2B – Primary melanoma**

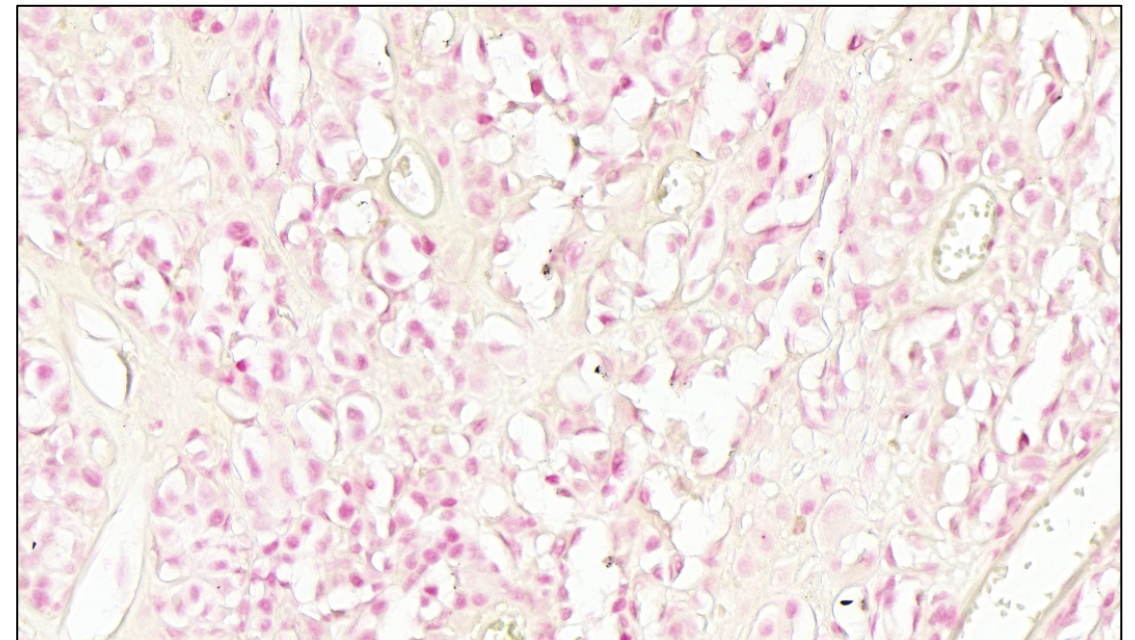

Supplementary Figure 8

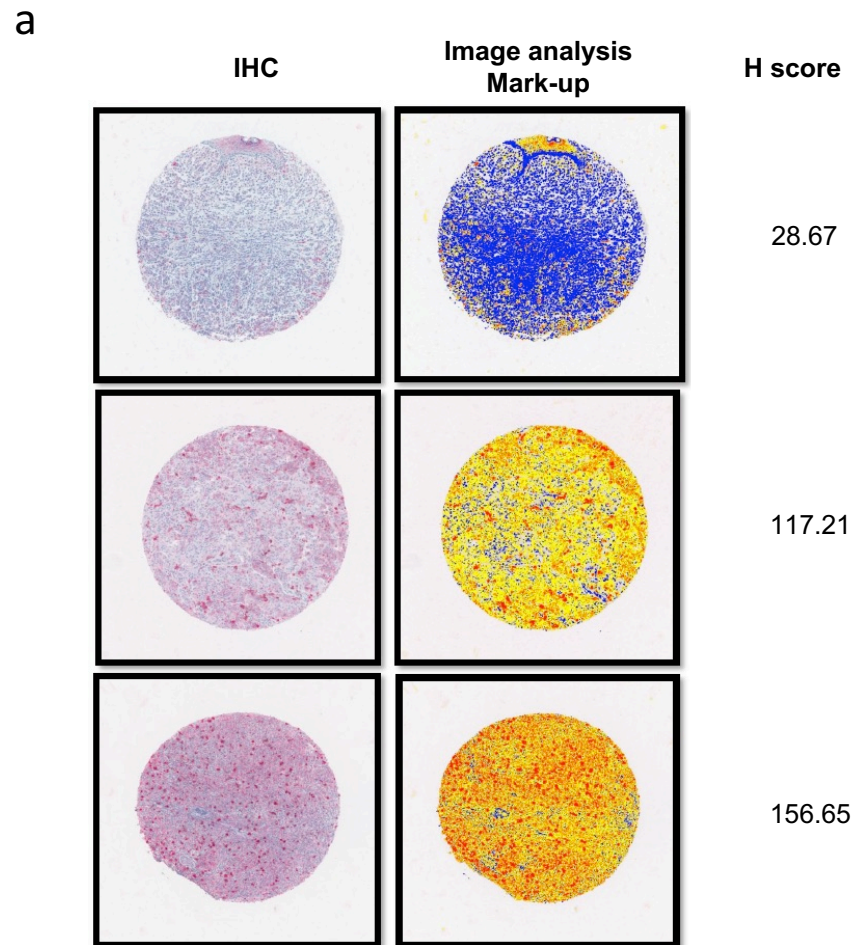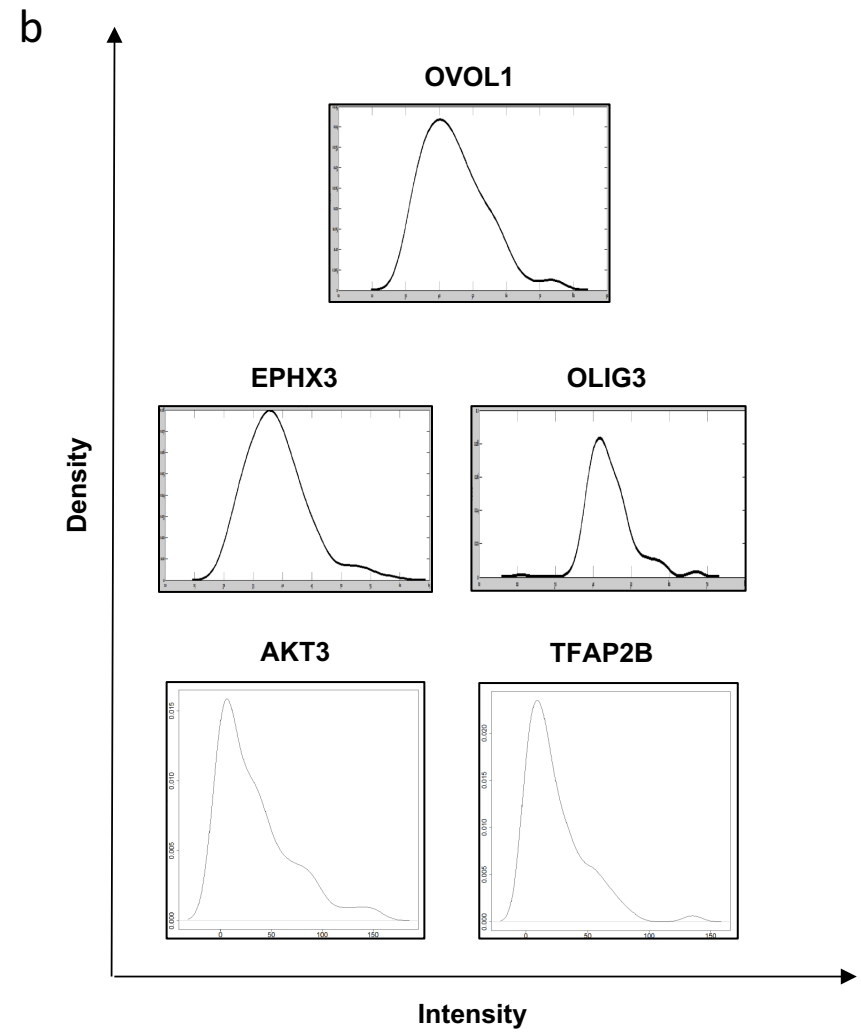



# Supplementary Figure 9

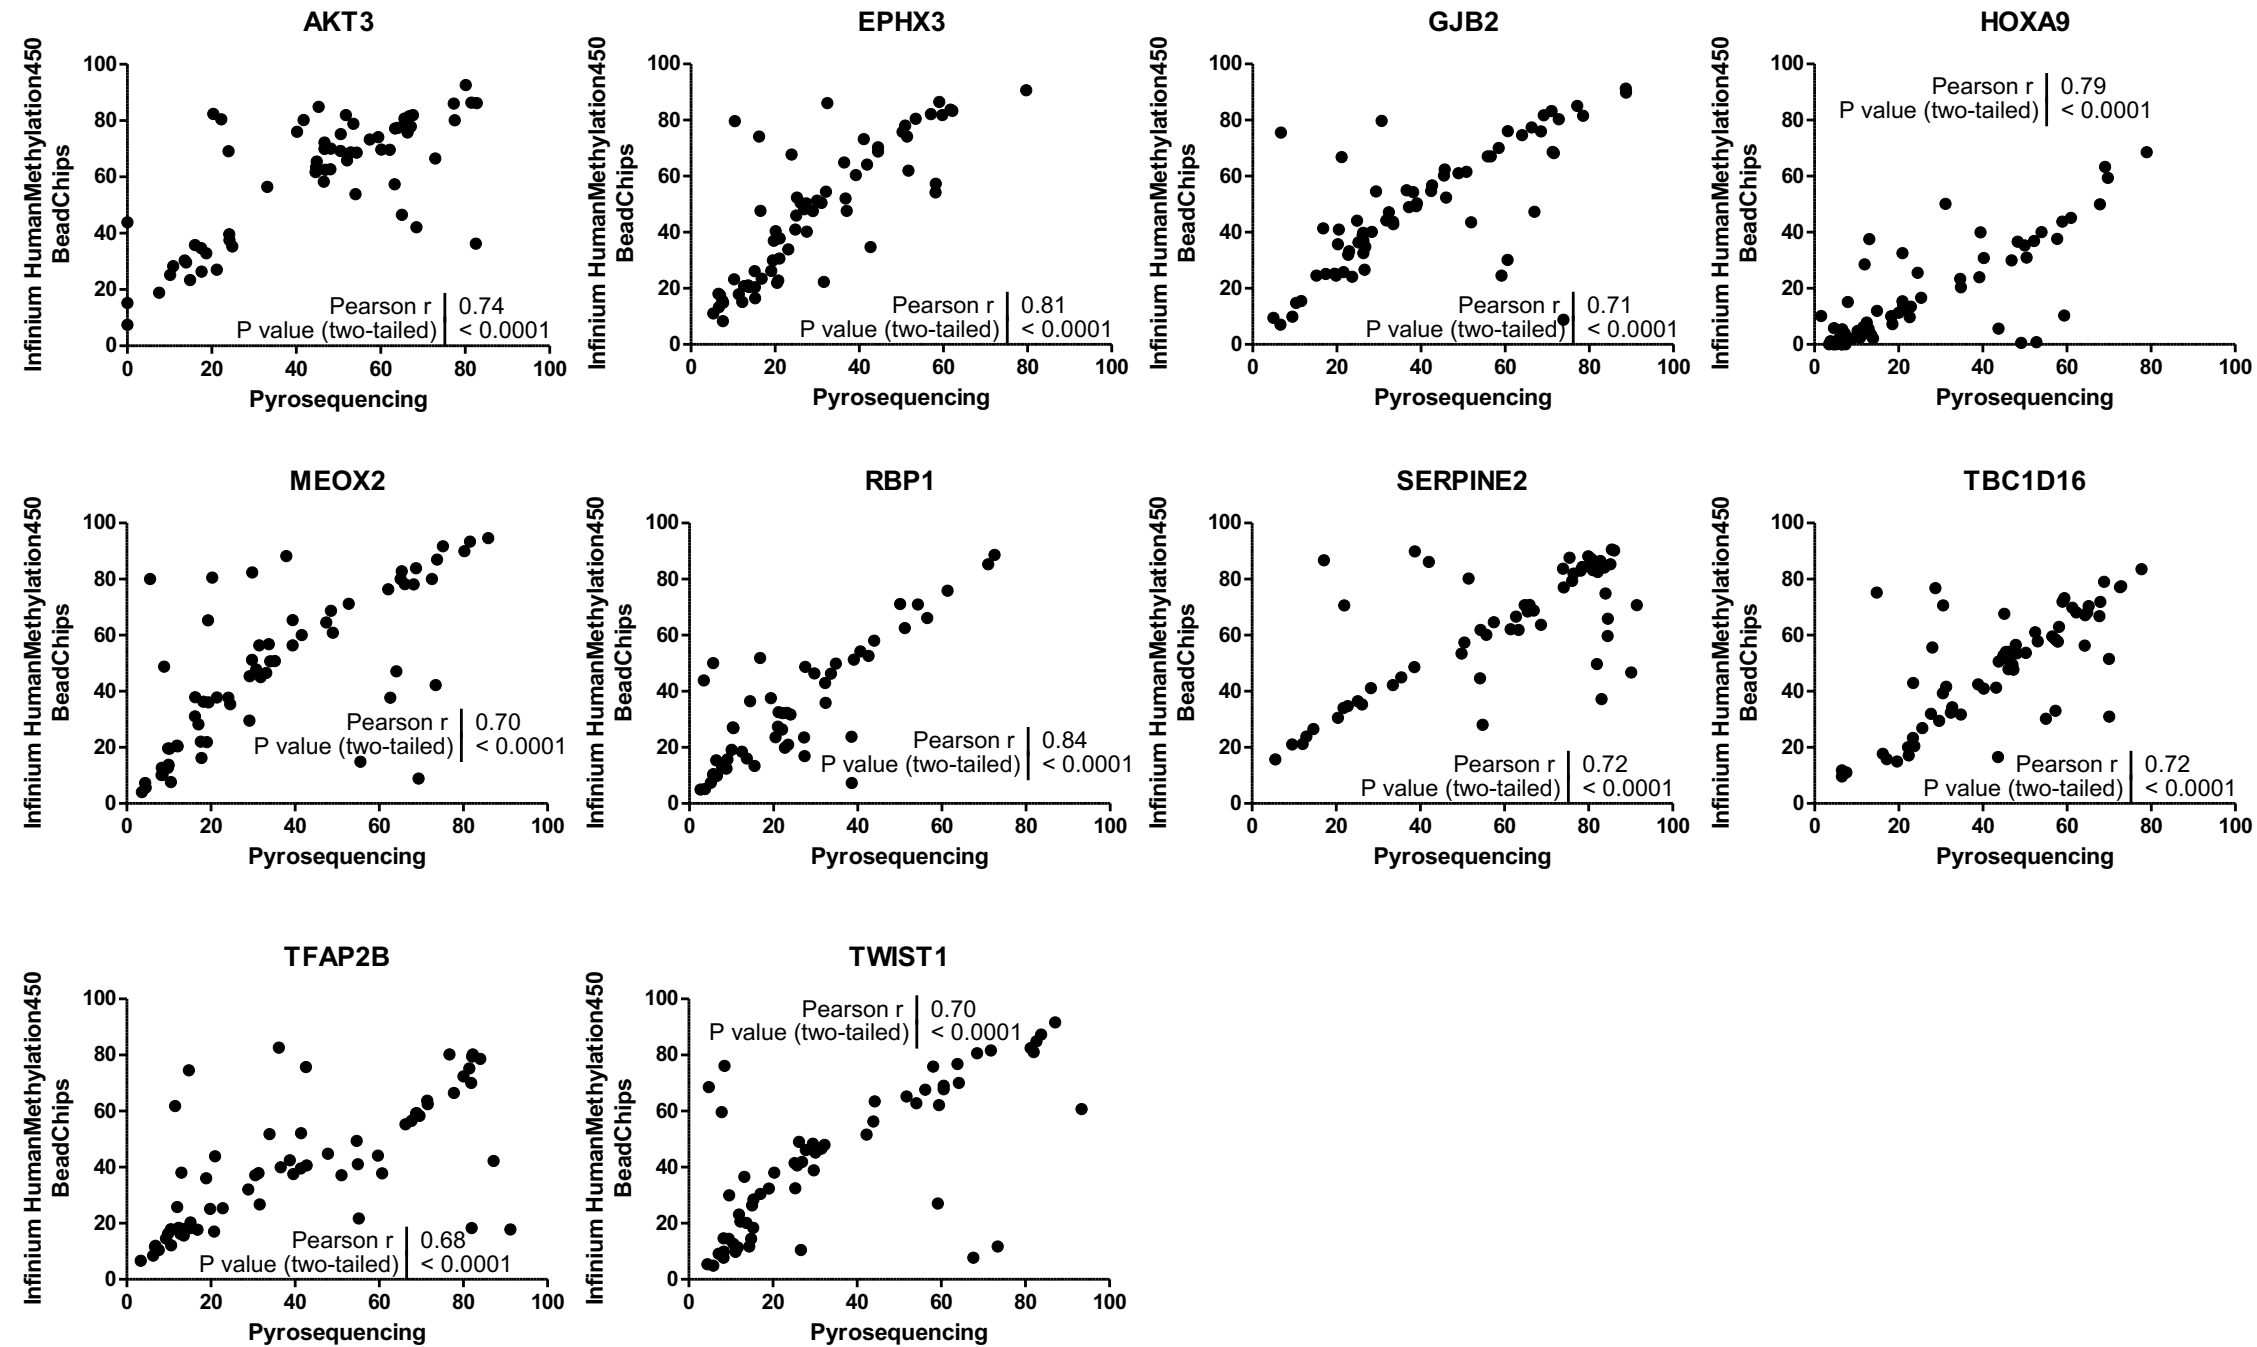

# Supplementary Figure 10

**a**

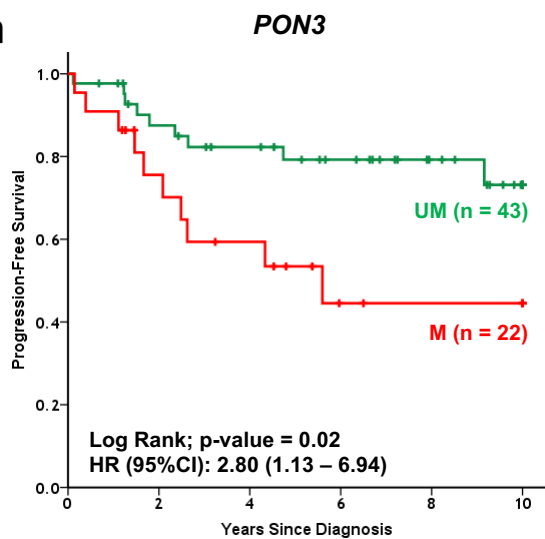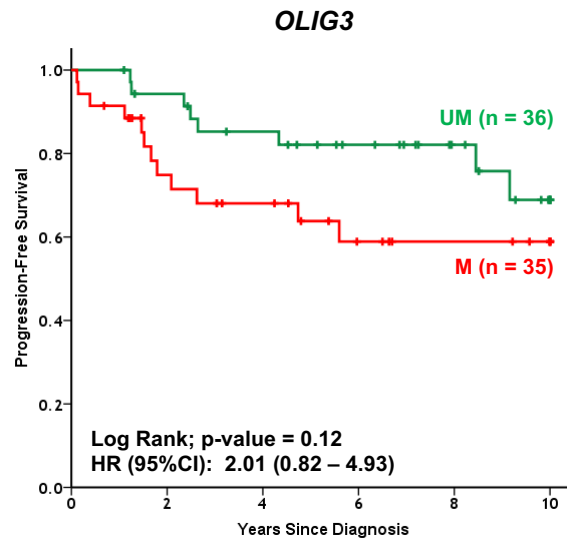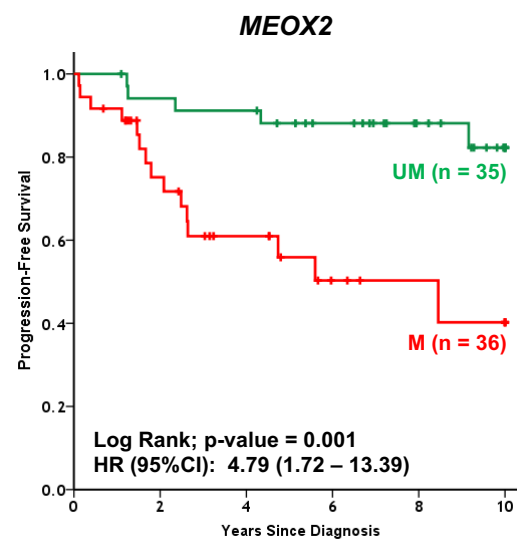

**b**

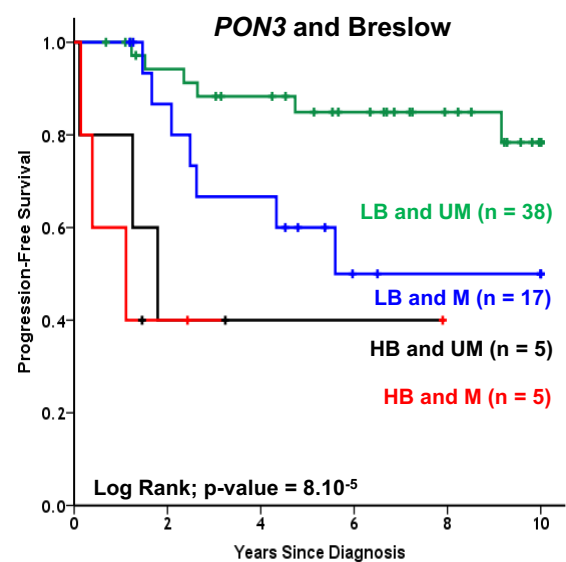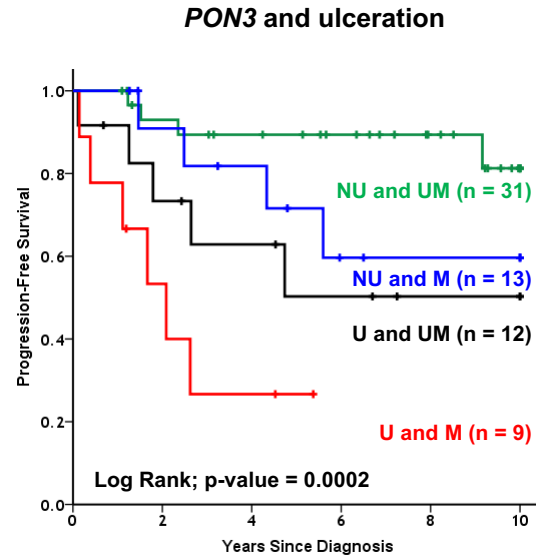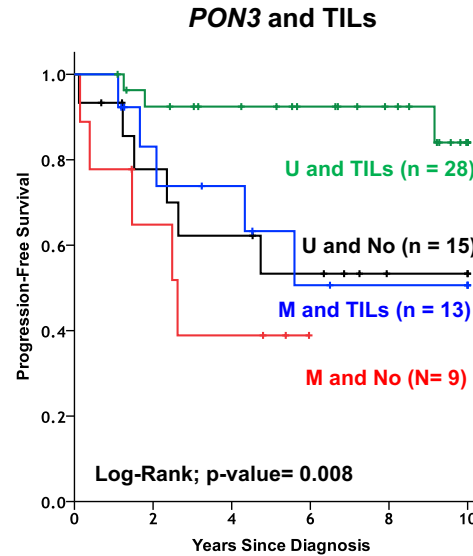

Patients features (N = 65)

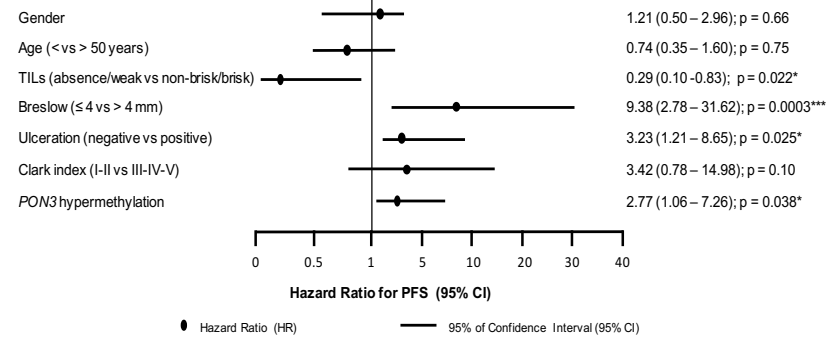

# Supplementary Figure 11

## PON3 in TCGA

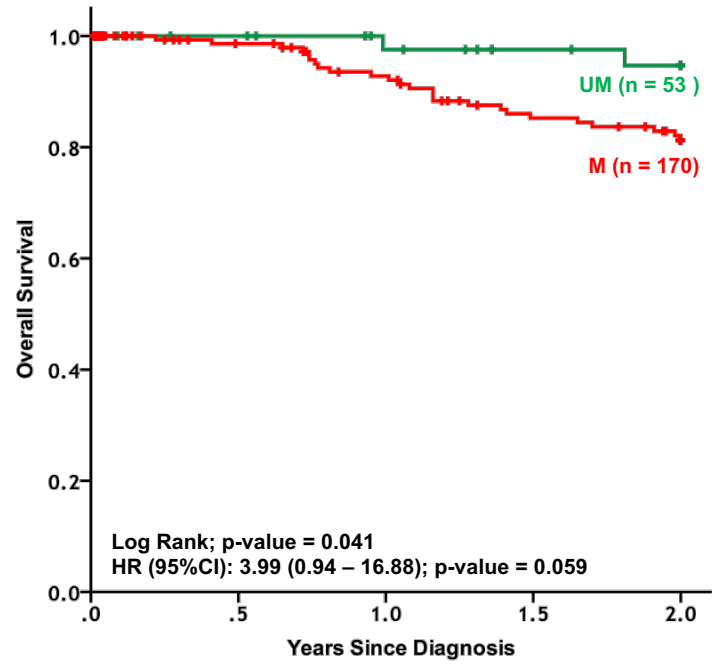

Supplementary Figure 12

**OVOL1**

**EPHX3**

**OLIG3**

**AKT3**

**TFAP2B**

**Low**

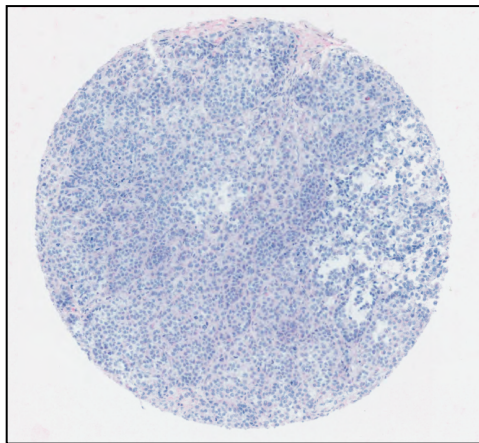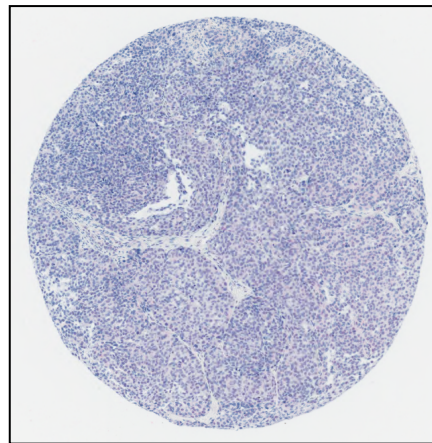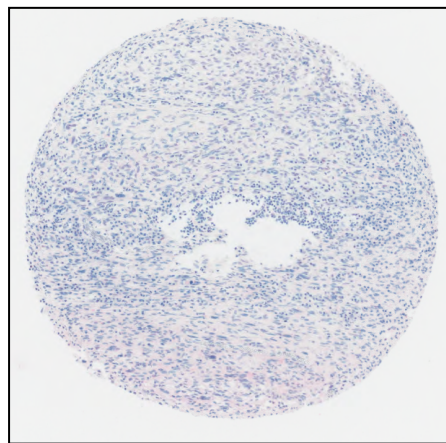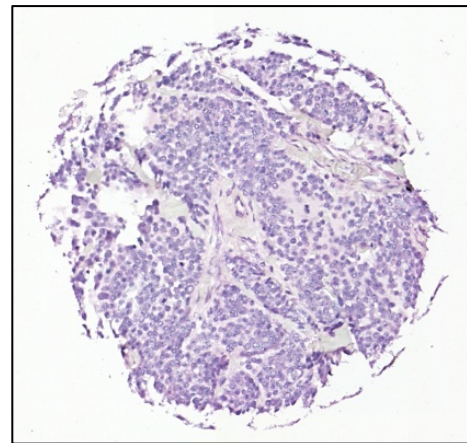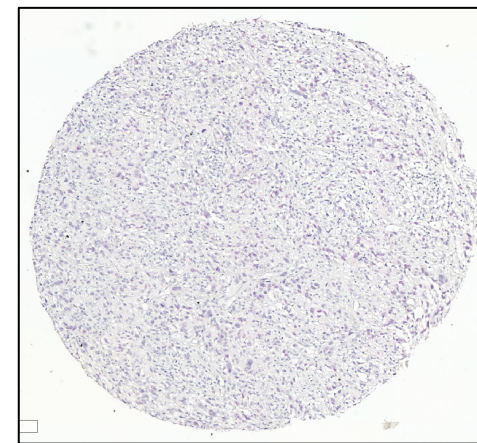

**High**

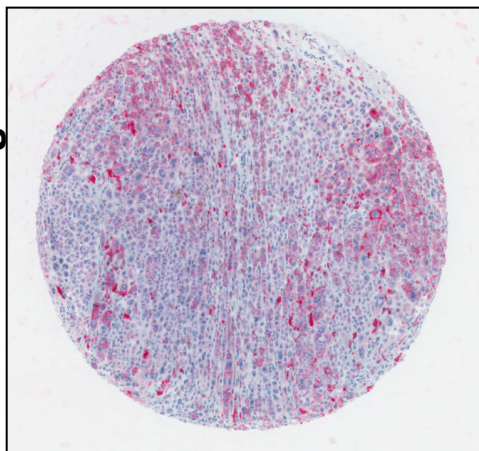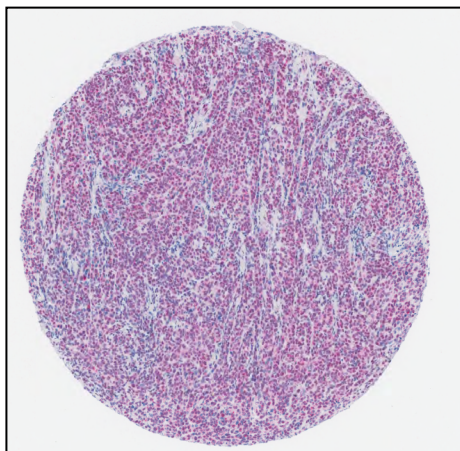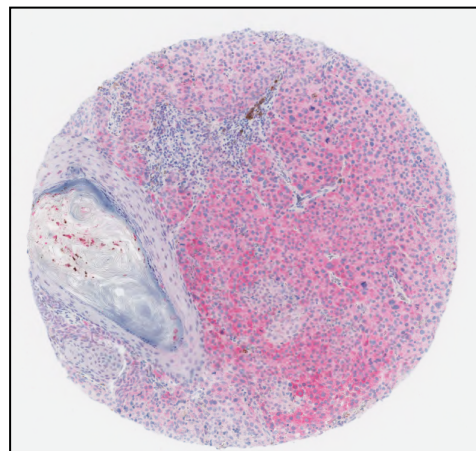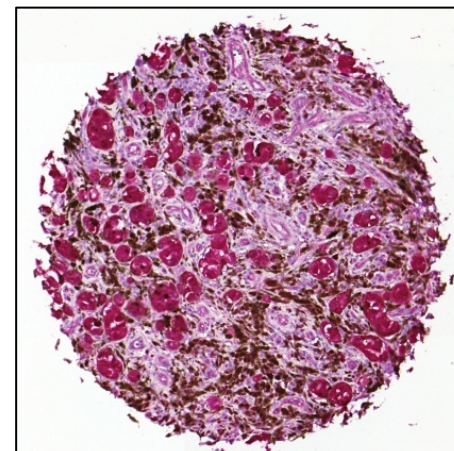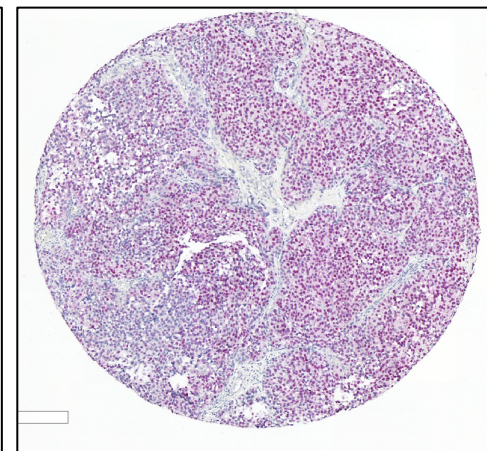

# Supplementary Figure 13

a

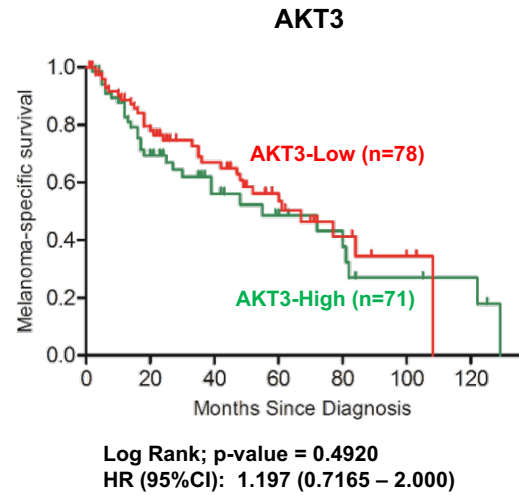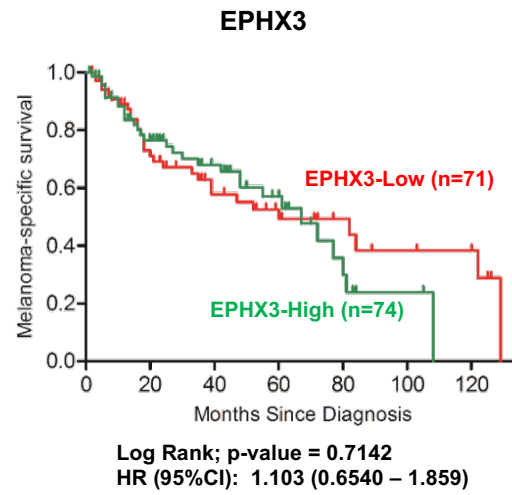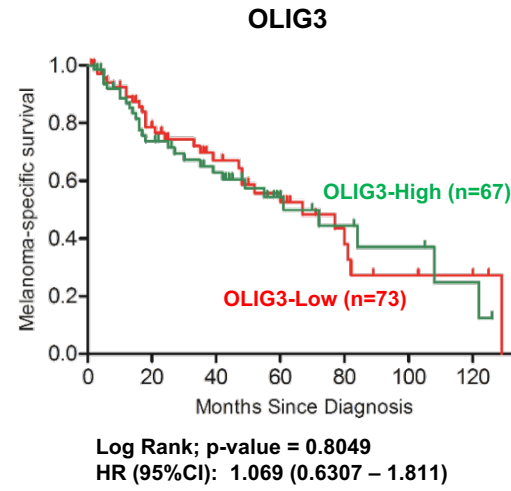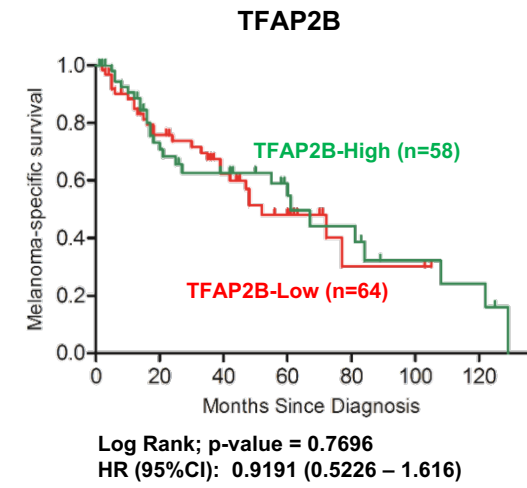

b

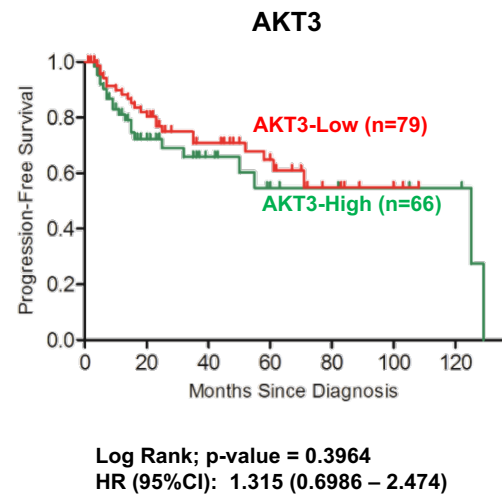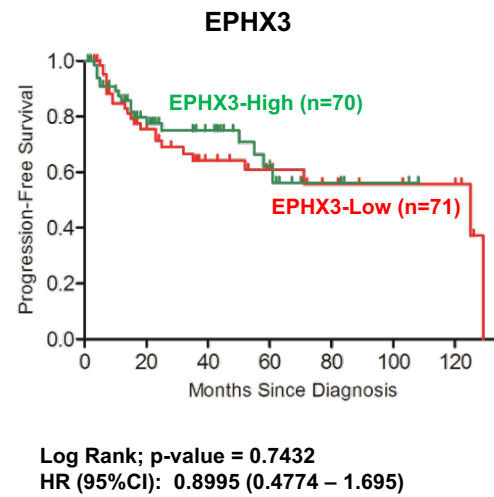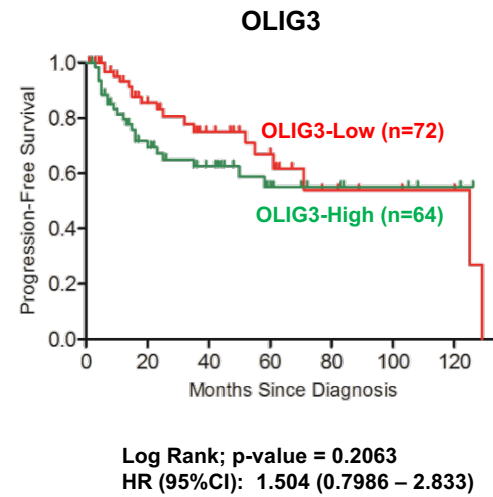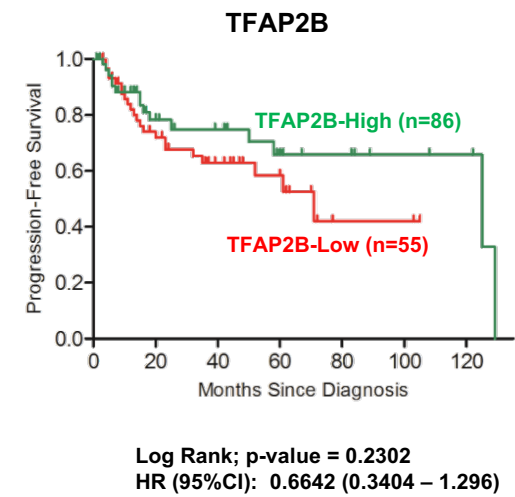

Supplement: 12916_2017_851_MOESM2_ESM.pdf [file 12916_2017_851_MOESM2_ESM.pdf]
